# Supplementary material for: The use of antenatal care in two rural districts of Upper West Region, Ghana
Source: PubMed Central journal article supplement (PMC5619770; doi:10.1371/journal.pone.0185537), 2017-09-28
Supplement: pone.0185537.s004.pdf [file pone.0185537.s004.pdf]

*In case of reply the date and number of his letter should be quoted*

Tel: +233 (03920) 91069

Fax:

Email:

My Ref. No GHS/NDHD/PS-7

Your Ref. ...

**Our Core Values:** *People Centered  
Professionalism, Team Work, Innovation,  
Discipline and Integrity.*

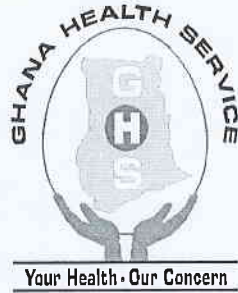

GHANA HEALTH SERVICE  
DISTRICT HEALTH DIRECTORATE  
P. O. BOX 3,  
NADOWLI. UWR.  
GHANA

9<sup>th</sup> November, 2015.

The Executive Officer  
Human Research Ethics Committee  
Office of Academic Governance  
Charles Sturt University  
Panorama Avenue  
Bathurst NSW 2795  
Tel: (02) 6338 4628  
Email: [ethics@csu.edu.au](mailto:ethics@csu.edu.au)

Dear Sir/Madam

**PERMISSION GRANT NOTIFICATION**  
**MR. JOSHUA SUMANKUORO**

On behalf of the District Health Administration, I write to formally indicate our awareness of the Research on **“Preparedness for Birth in Rural Areas– Perspectives of Expectant Mothers, Community Residents and Birth Attendants in Two Rural Districts in Ghana”**, a student of Charles Sturt University, Australia.

We are aware that Joshua intends to conduct his research by administering a survey questionnaire to our employees and pregnant women using our service (subject to their personal consent), which will enable him obtain an understanding of issues pertaining in birth preparedness and complication readiness in our rural and remote areas.

By this letter, I affirm that we shall provide relevant information to support the conduct of his study.

Thank you.

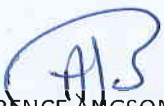  
FLORENCE AMGSOMWINE  
DIRECTOR OF HEALTH SERVICES  
NADOWLI/KALEO DISTRICT  
NADOWLI

DISTRICT DIRECTOR  
GHANA HEALTH SERVICES  
BOX 3, NADOWLI - UWR
